# Supplementary material for: An intriguing window opened by a metallic two-dimensional Lindqvist-cobaltporphyrin organic framework as an electrochemical catalyst for the CO2reduction reaction
Source: Royal Society of Chemistry journal article supplement (doi:10.1039/d0ta04993j), 2020-01-01
Supplement: d0ta04993j1.pdf [file d0ta04993j1.pdf]

## Supporting Information for

### **An intriguing window opened by a metallic two-dimensional Lindqvist-cobaltporphyrin organic framework as an electrochemical catalyst for the CO<sub>2</sub> reduction reaction**

Cong Wang,<sup>a</sup> Chang-Yan Zhu,<sup>a</sup> Min Zhang,<sup>\*a</sup> Yun Geng,<sup>a</sup> Yang-Guang Li<sup>b</sup> and Zhong-Min Su<sup>\*a,c</sup>

<sup>a</sup> Institute of Functional Material Chemistry, Faculty of Chemistry & National & Local United Engineering Laboratory for Power Battery, Northeast Normal University, 5268 Renmin Street, Changchun 130024, China.

<sup>b</sup> Key Laboratory of Polyoxometalate Science of Ministry of Education, Faculty of Chemistry, Northeast Normal University, 5268 Renmin Street, Changchun 130024, China

<sup>c</sup> School of Chemistry and Environmental Engineering, Changchun University of Science and Technology, 7989 Weixing Road, Changchun 130022, China.

\*Emails: mzhang@nenu.edu.cn; zmsu@nenu.edu.cn

## Table of contents

(Total Number of Pages: 25, Total Number of Figures: 17, Total Number of Tables: 4)

|                                                                                                                                                                                                             |          |
|-------------------------------------------------------------------------------------------------------------------------------------------------------------------------------------------------------------|----------|
| 1. Model and computational details. (Fig. S1, Table S1)                                                                                                                                                     | Page S3  |
| 2. The thermodynamic stability of 2D reductive Fe-PMOF, Co-PMOF, Rh-PMOF, and Ir-PMOF. (Fig. S2)                                                                                                            | Page S6  |
| 3. The PDOS of 2D reductive Ni-PMOF, Cu-PMOF, Zn-PMOF, Ru-PMOF, Pd-PMOF, Os-PMOF and Pt-PMOF. (Fig. S3)                                                                                                     | Page S7  |
| 4. The work functions of 2D reductive Fe-PMOF, Co-PMOF, Rh-PMOF, and Ir-PMOF. (Fig. S4)                                                                                                                     | Page S9  |
| 5. The optimized structures of intermediates corresponding to the optimal hydrogenation path of the CO <sub>2</sub> on the 2D reductive Fe-PMOF, Co-PMOF, Rh-PMOF, and Ir-PMOF. (Fig. S5-S8)                | Page S10 |
| 6. Schematic diagrams of the reduction reaction of [Mo <sub>6</sub> ] clusters in Co-PMOF, and the corresponding PDOS diagrams of unreduced and reduced Co-PMOF. (Fig. S9, S10)                             | Page S12 |
| 7. The PDOS of 2D reductive Fe-PMOF, Co-PMOF, Rh-PMOF, and Ir-PMOF adsorbing the intermediates of each step along the optimal reaction pathway. (Fig. S11-S14)                                              | Page S14 |
| 8. The PDOS of *CHO intermediates adsorbed on 2D reductive Fe-PMOF, Co-PMOF, Rh-PMOF, and Ir-PMOF. (Fig. S15)                                                                                               | Page S18 |
| 9. The PDOS of reductive Co-PMOF before and after another electron acquisition. (Fig. S16)                                                                                                                  | Page S19 |
| 10. The Gibbs free energy diagram of HER on 2D reductive TM-PMOF (TM = Fe, Co, Rh, Ir). (Fig. S17)                                                                                                          | Page S19 |
| 11. The calculated adsorption energy ( $E_{\text{ads}}$ ), cohesive energy per atom ( $E_{\text{coh}}$ ), and formation energy ( $E_{\text{f}}$ ) of 2D reductive TM-PMOF (TM = Fe, Co, Rh, Ir). (Table S2) | Page S20 |
| 12. The optimal reaction pathways of 2D reductive TM-PMOF (TM = Fe, Co, Rh, Ir). (Table S3)                                                                                                                 | Page S21 |
| 13. Charge states analyzed by Hirshfeld charge of the three moieties for 2D reductive Co-PMOF along the optimal reaction pathway. (Table S4)                                                                | Page S21 |
| 14. The atomic coordinates of the optimized 2D reductive Co-PMOF system.                                                                                                                                    | Page S22 |
| 15. Supplementary references                                                                                                                                                                                | Page S25 |

## Model and Computational details

### Model

A series of 2D TM-PMOF are constructed by linking reductive Lindqvist-type hexamolybdate ( $[\text{Mo}_6]^{2e/2H}$ ) with 4-connected tetra-(4-aminophenyl) metalloporphyrin (TM-TAPP) building units through the  $\text{Mo}\equiv\text{N}$  triple bond (Fig. S1), where transition metals are common catalytic ones, including Fe, Co, Ni, Cu, Zn, Ru, Rh, Pd, Os, Ir, Pt. Typically, the interpenetrated topology might endow these structures with high chemical, thermal stability, and the direct connection of  $[\text{Mo}_6]^{2e/2H}$  clusters with TM-TAPP ligands in a structure would presumably create an oriented electron transportation pathway under external driven voltage that might be beneficial for efficient charge transfer. A vacuum space of 30 Å in the z direction is adopted to avoid the interactions between the periodic layers.

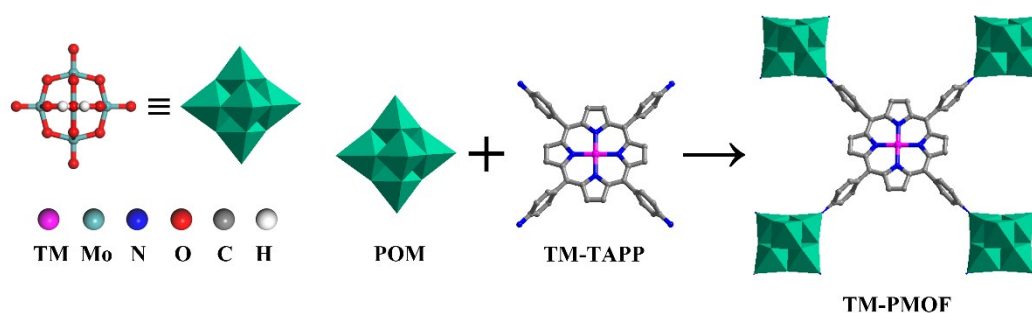

**Fig. S1** Schematic illustration of the structure of 2D reductive TM-PMOF (TM = Fe, Co, Ni, Cu, Zn, Ru, Rh, Pd, Os, Ir, Pt).

### Computational details

The spin-polarized density functional method within DMol<sup>3</sup> code has been adopted for all calculations.<sup>1,2</sup> The Perdew-Burke-Ernzerhof (PBE) exchange-correlation functional of the generalized gradient approximation (GGA) was used for describing the electron interactions.<sup>3</sup> The DFT semi-core pseudopotential (DSPP) method was employed to consider the relativistic effects of transition metals, and the double numerical plus polarization (DNP) basis set was used for other elements.<sup>4</sup> The DFT-D2 method with the Grimme vdW correction was applied to describe the dispersion

interaction.<sup>5</sup> However, the calculations including Os, Ir, and Pt were performed without vdW corrections because of the lack of database. Self-consistent field (SCF) calculations were performed with a convergence criterion of  $10^{-6}$  a.u. on the total energy and electronic computations. The conductor-like screening model (COSMO) was used to simulate a H<sub>2</sub>O solvent environment throughout the whole process (dielectric constant: 78.54). The dipole correction was considered in all the calculations. The Brillouin zones were sampled with a  $5 \times 5 \times 1$  k-point grid for geometry optimizations, whereas a  $12 \times 12 \times 1$  grid was used for electronic structure computations. The Hirshfeld charge analysis was performed to study the charge transfer.<sup>6</sup> The thermodynamic stabilities of these TM-PMOFs were checked by performing *ab initio* molecular dynamics (AIMD) simulations at 300 K using the Nosé-Hoover heat bath scheme, in which the time step was set at 1.0 fs for a total period of 5 ps.

The adsorption energy ( $E_{\text{ads}}$ ) for \*CO intermediate on the 2D reductive TM-PMOF was defined as  $E_{\text{ads}} = E_{\text{TM-PMOF-CO}} - E_{\text{TM-PMOF}} - E_{\text{CO}}$ , where  $E_{\text{TM-PMOF-CO}}$ ,  $E_{\text{TM-PMOF}}$  and  $E_{\text{CO}}$  are the total energy for the total energy for the \*CO adsorbed on the 2D reductive TM-PMOF, the pure 2D TM-PMOF, and the CO molecule, respectively. A negative value of the  $E_{\text{ads}}$  suggests favorable adsorption. The change in Gibbs free energy ( $\Delta G$ ) of every elemental step was acquired by applying the computational hydrogen electrode (CHE) model proposed by Nørskov et al.<sup>7,8</sup> In detail, the Gibbs free energy change is defined as  $\Delta G = \Delta E + \Delta E_{\text{ZPE}} - T\Delta S + \Delta G_{\text{pH}} + \Delta G_{\text{U}}$ , where  $\Delta E$  is the electronic energy difference directly obtained by DFT calculations,  $\Delta E_{\text{ZPE}}$  is the zero-point energy change,  $T$  is set at room temperature (298.15 K), and  $\Delta S$  is the entropy change. The zero-point energies and entropies of adsorbed species were calculated from the vibrational frequencies, in which only the vibrational modes of adsorbate were calculated explicitly, while the catalyst substrate was fixed.<sup>9-11</sup> The entropies and vibrational frequencies of the free molecules were taken from the NIST database.<sup>12</sup> At the same time, the calculated energies, ZPE and TS of these free molecules are listed in Table S1.  $\Delta G_{\text{pH}}$  is the free energy correction of pH, which can be calculated by  $\Delta G_{\text{pH}} = 2.303k_{\text{B}}T\text{pH}$  ( $k_{\text{B}}$  is the Boltzmann constant, and the value of pH was set to zero for all

the calculations here).  $\Delta G_U$  is the free energy contribution related to electrode potential (U), which can be determined as  $\Delta G_U = -neU$ , where n is the number of electrons transferred and U is the applied electrode potential.

**Table S1.** Energy data and correction of free molecules.

| Free molecules         | Energy (eV) | ZPE (eV) | TS (eV) | G (eV)   |
|------------------------|-------------|----------|---------|----------|
| H <sub>2</sub> (g)     | -31.82      | 0.26     | 0.40    | -31.96   |
| H <sub>2</sub> O (l)   | -2078.67    | 0.56     | 0.58    | -2078.69 |
| CO <sub>2</sub> (g)    | -5128.84    | 0.31     | 0.66    | -5129.19 |
| CO (g)                 | -3180.25    | 0.13     | 0.61    | -3180.73 |
| HCHO (g)               | -3113.74    | 0.70     | 0.68    | -3113.72 |
| CH <sub>3</sub> OH (l) | -3146.80    | 1.35     | 0.74    | -3146.19 |
| CH <sub>4</sub> (g)    | -1101.13    | 1.18     | 0.58    | -1100.53 |

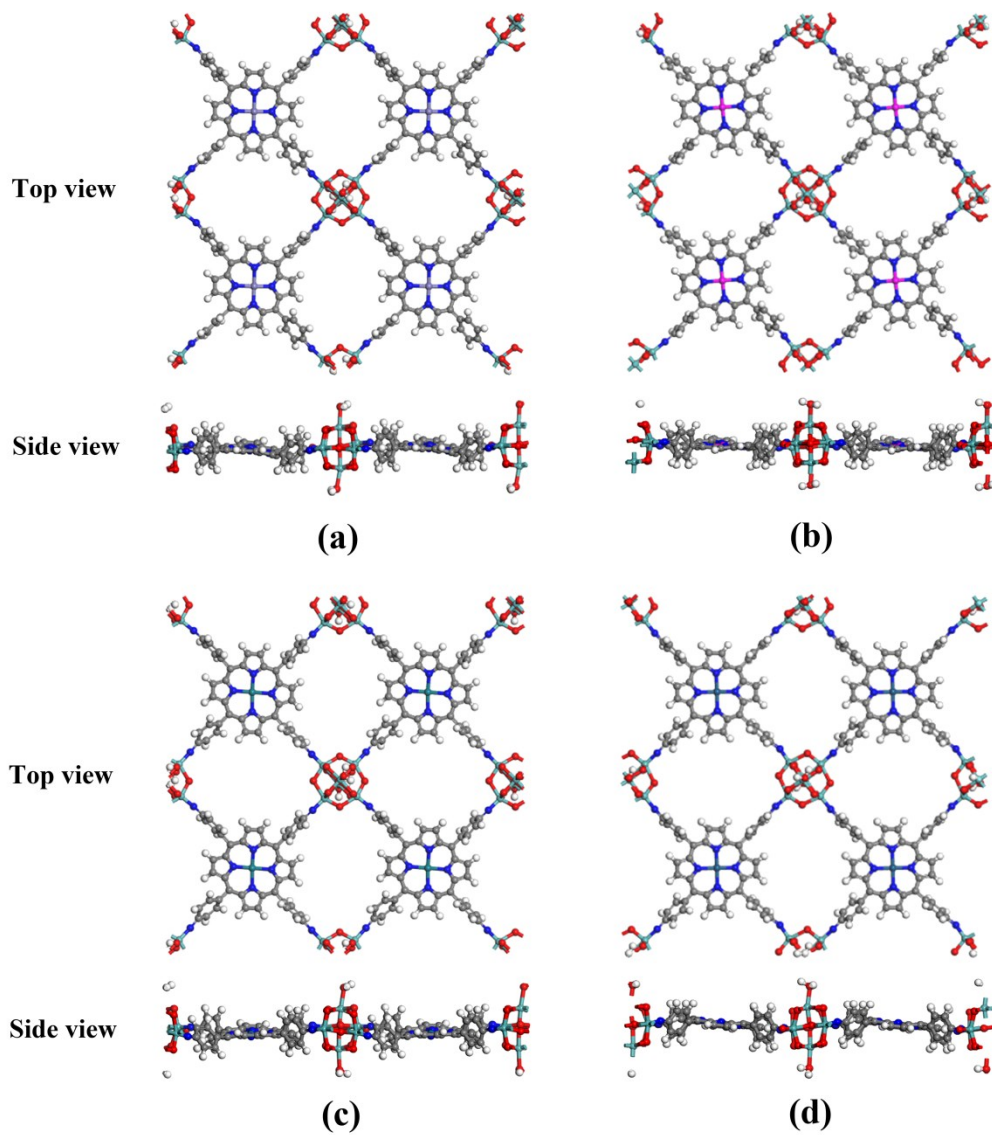

**Fig. S2** The top and side views of the final structures of 2D reductive (a) Fe-PMOF, (b) Co-PMOF, (c) Rh-PMOF, and (d) Ir-PMOF at 300 K after 5000 steps of AIMD simulations.

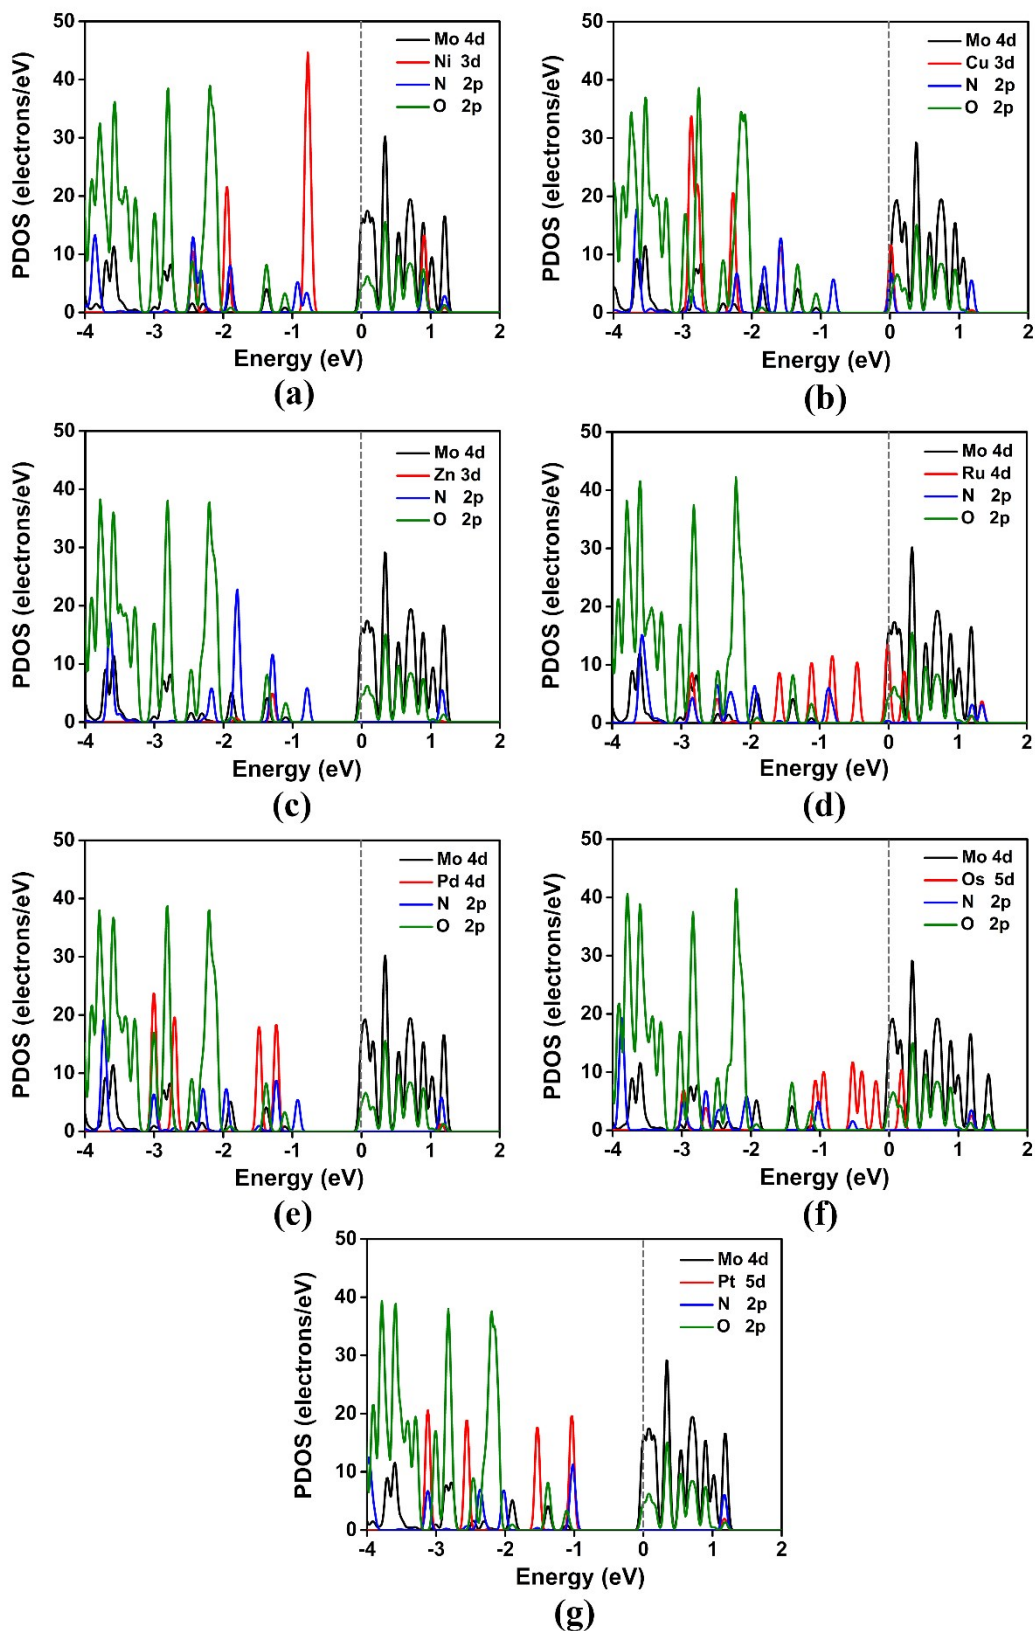

**Fig. S3** The PDOS of 2D reductive (a) Ni-PMOF, (b) Cu-PMOF, (c) Zn-PMOF, (d) Ru-PMOF, (e) Pd-PMOF, (f) Os-PMOF and (g) Pt-PMOF.

To explore the best catalysts for CO<sub>2</sub> reduction, we analysed the PDOS of all reductive TM-PMOFs as shown in Fig. 4 and Fig. S3, separately. Firstly, according to the calculated PDOS results, we found that only the Fe-3d, Co-3d, Cu-3d, Ru-4d states originated from the central TM atoms in porphyrin rings cross the Fermi level, signifying that the 2D Fe-PMOF, Co-PMOF, Cu-PMOF, Ru-PMOF maybe possess high catalytic performance. Secondly, we know that if electron can be quickly transferred from the POM cluster to the central TM atom in porphyrin ring, the Mo-4d states originated from the [Mo<sub>6</sub>]<sup>2e/2H</sup> clusters also needs to cross the Fermi level. Hence, the 2D Fe-PMOF does not have obvious advantages. Finally, we found that only the Mo-4d states originated from the [Mo<sub>6</sub>]<sup>2e/2H</sup> clusters in 2D Co-PMOF within these TM-PMOFs cross the Fermi level and overlap with Co-3d states from cobaltporphyrin at the Fermi level to a higher density, which represents that the acquired electrons by the [Mo<sub>6</sub>]<sup>2e/2H</sup> moiety can facilitate the transfer to the central Co atom in porphyrin rings due to their close energies and narrow distribution range. The feature ultimately benefits to a potentially high catalytic activity. Therefore, the Co-PMOF might be the best catalyst for CO<sub>2</sub> reduction based on the features of their PDOS.



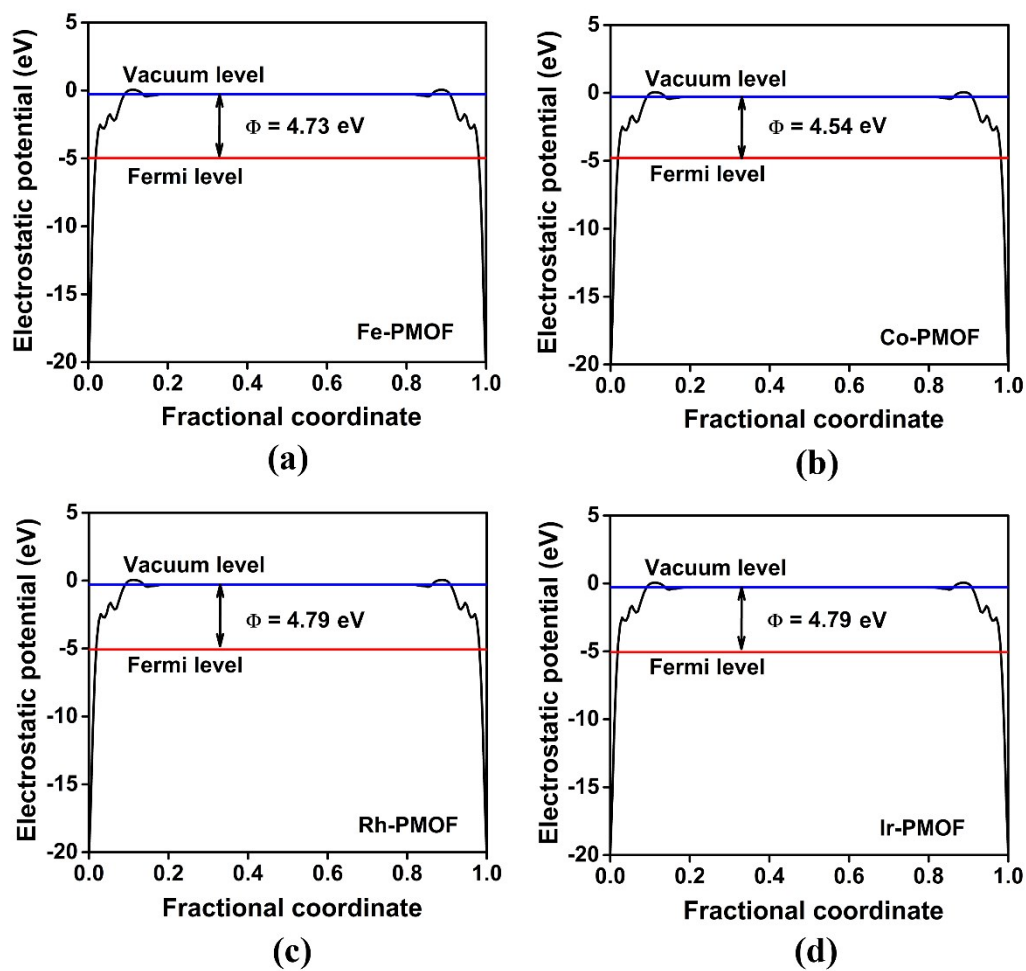

**Fig. S4** The work functions of 2D reductive (a) Fe-PMOF, (b) Co-PMOF, (c) Rh-PMOF, and (d) Ir-PMOF.

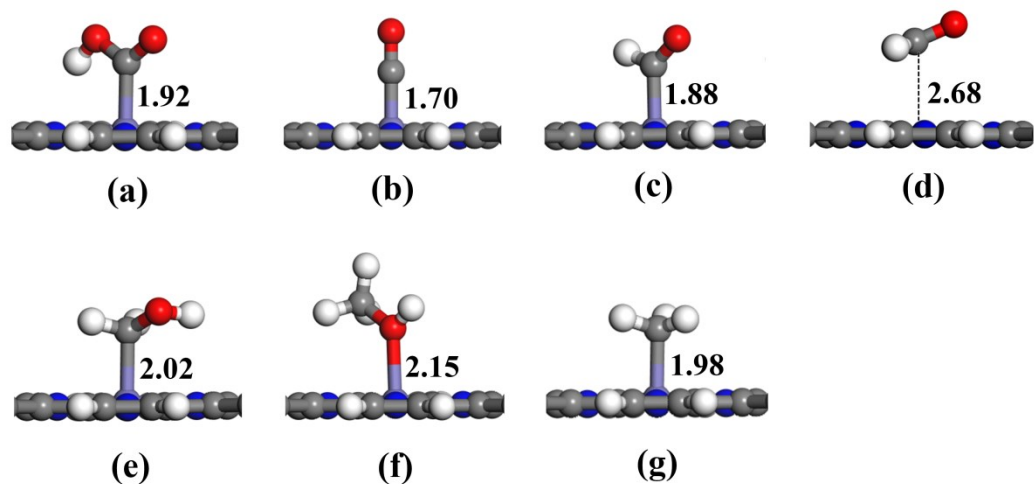

**Fig. S5** The optimized structures of intermediates corresponding to the optimal hydrogenation path of the  $\text{CO}_2$  on the 2D reductive Fe-PMOF: (a)  $^*\text{COOH}$ , (b)  $^*\text{CO}$ , (c)  $^*\text{CHO}$ , (d)  $^*\text{CH}_2\text{O}$ , (e)  $^*\text{CH}_2\text{OH}$ , (f)  $^*\text{OHCH}_3$ , (g)  $^*\text{CH}_3$ . The bond length is labeled in Å.

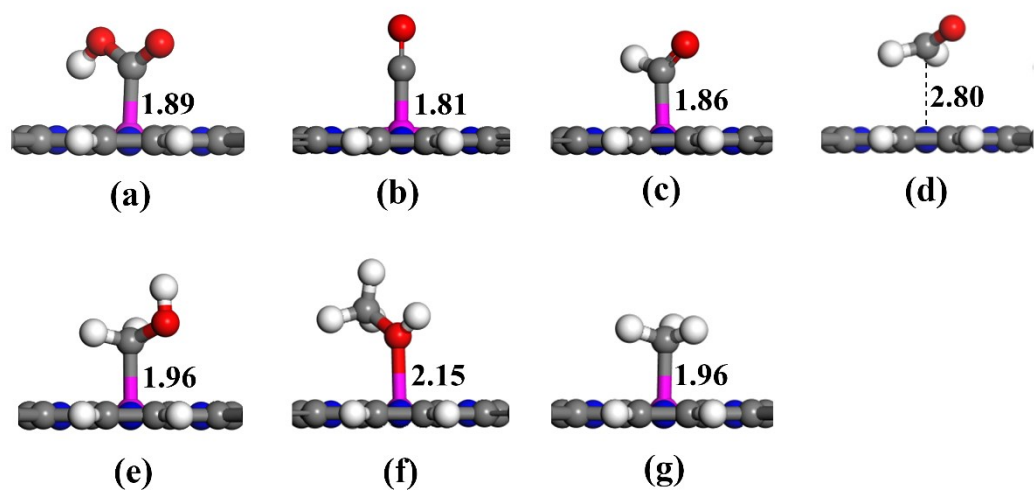

**Fig. S6** The optimized structures of intermediates corresponding to the optimal hydrogenation path of the  $\text{CO}_2$  on the 2D reductive Co-PMOF: (a)  $^*\text{COOH}$ , (b)  $^*\text{CO}$ , (c)  $^*\text{CHO}$ , (d)  $^*\text{CH}_2\text{O}$ , (e)  $^*\text{CH}_2\text{OH}$ , (f)  $^*\text{OHCH}_3$ , (g)  $^*\text{CH}_3$ . The bond length is labeled in Å.

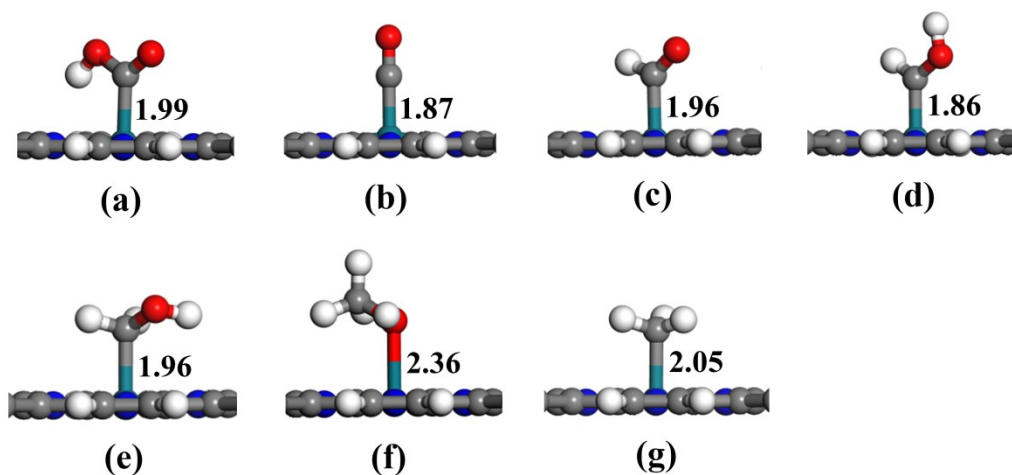

**Fig. S7** The optimized structures of intermediates corresponding to the optimal hydrogenation path of the  $\text{CO}_2$  on the 2D reductive Rh-PMOF: (a)  $\text{*COOH}$ , (b)  $\text{*CO}$ , (c)  $\text{*CHO}$ , (d)  $\text{*CHOH}$ , (e)  $\text{*CH}_2\text{OH}$ , (f)  $\text{*OHCH}_3$ , (g)  $\text{*CH}_3$ . The bond length is labeled in Å.

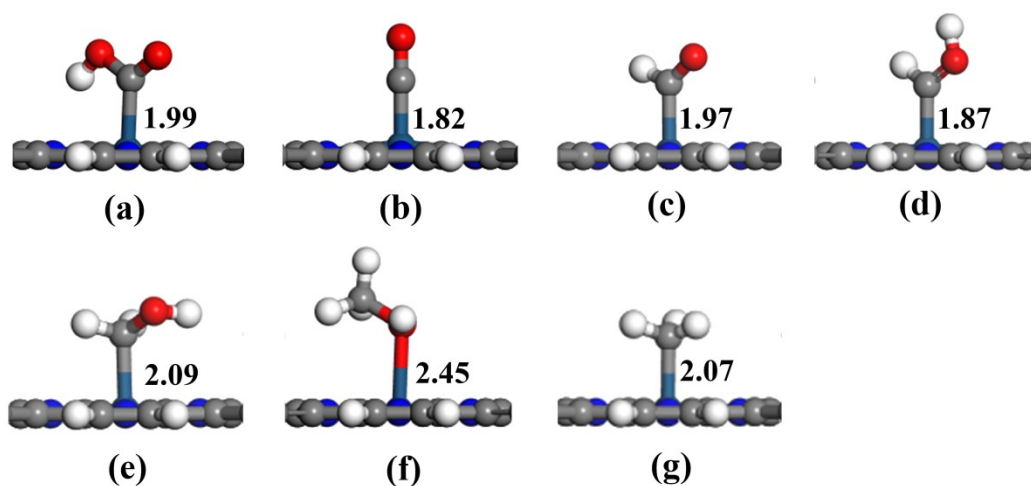

**Fig. S8** The optimized structures of intermediates corresponding to the optimal hydrogenation path of the  $\text{CO}_2$  on the 2D reductive Ir-PMOF: (a)  $\text{*COOH}$ , (b)  $\text{*CO}$ , (c)  $\text{*CHO}$ , (d)  $\text{*CHOH}$ , (e)  $\text{*CH}_2\text{OH}$ , (f)  $\text{*OHCH}_3$ , (g)  $\text{*CH}_3$ . The bond length is labeled in Å.

### The feasibility of the reduction to $[\text{Mo}_6]^{2e/2\text{H}}$ from $[\text{Mo}_6]$ in 2D Co-PMOF

Considering the successful experimental synthesis of three-dimensional (3D) reductive polyoxometalate-metalloporphyrin organic frameworks constructed by reductive Zn- $\epsilon$ -Keggin clusters and metalloporphyrin linkers,<sup>13,14</sup> as well as the extensive application of highly active, reductive polyoxometalates in the field of electrocatalysis,<sup>15,16</sup> it is convinced that our proposed 2D reductive Co-PMOF structure is experimentally feasible and can be used as  $\text{CO}_2$  reduction catalyst with excellent performance. Here, to verify the feasibility of the reduction to  $[\text{Mo}_6]^{2e/2\text{H}}$  from  $[\text{Mo}_6]$  in 2D Co-PMOF, we calculate that the  $[\text{Mo}_6]^{2e/2\text{H}}$  units inside are easily reduced from the  $[\text{Mo}_6]$  with a low energy demand (0.08 eV), indicating that this reduction process is easy to occur.

Moreover, by analyzing the partial density of states (PDOS) diagrams of unreduced and reduced Co-PMOF (Fig. S10), we found that unreduced Co-PMOF is a narrow band gap semiconductor, and the reduced Co-PMOF has superior conductivity and potential electrocatalytic performance.

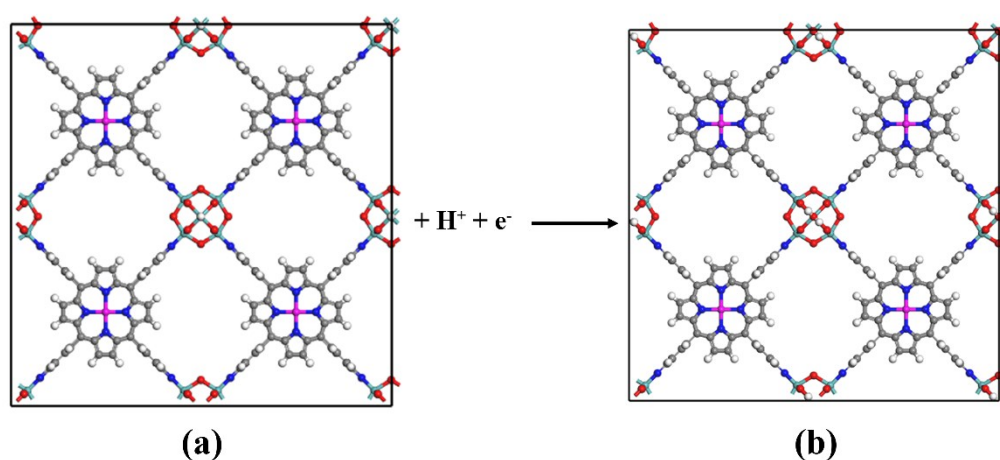

**Fig. S9** Schematic diagrams of the reduction reaction of  $[\text{Mo}_6]$  clusters in 2D Co-PMOF.  $[\text{Mo}_6]$  experiences a two-electron/proton-coupled reduction to form  $[\text{Mo}_6]^{2e/2\text{H}}$ . The (a) and (b) denote the unreduced Co-PMOF and reduced Co-PMOF, respectively.

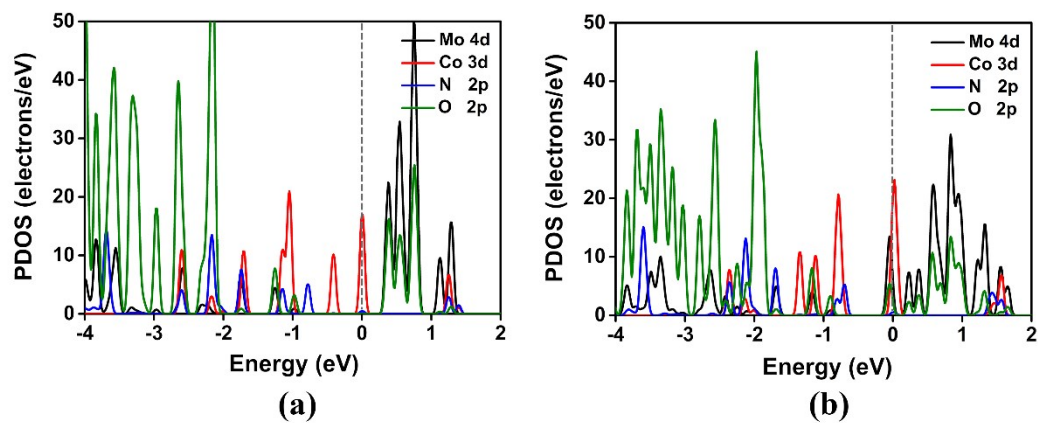

**Fig. S10** The PDOS of (a) unreduced Co-PMOF and (b) reduced Co-PMOF.

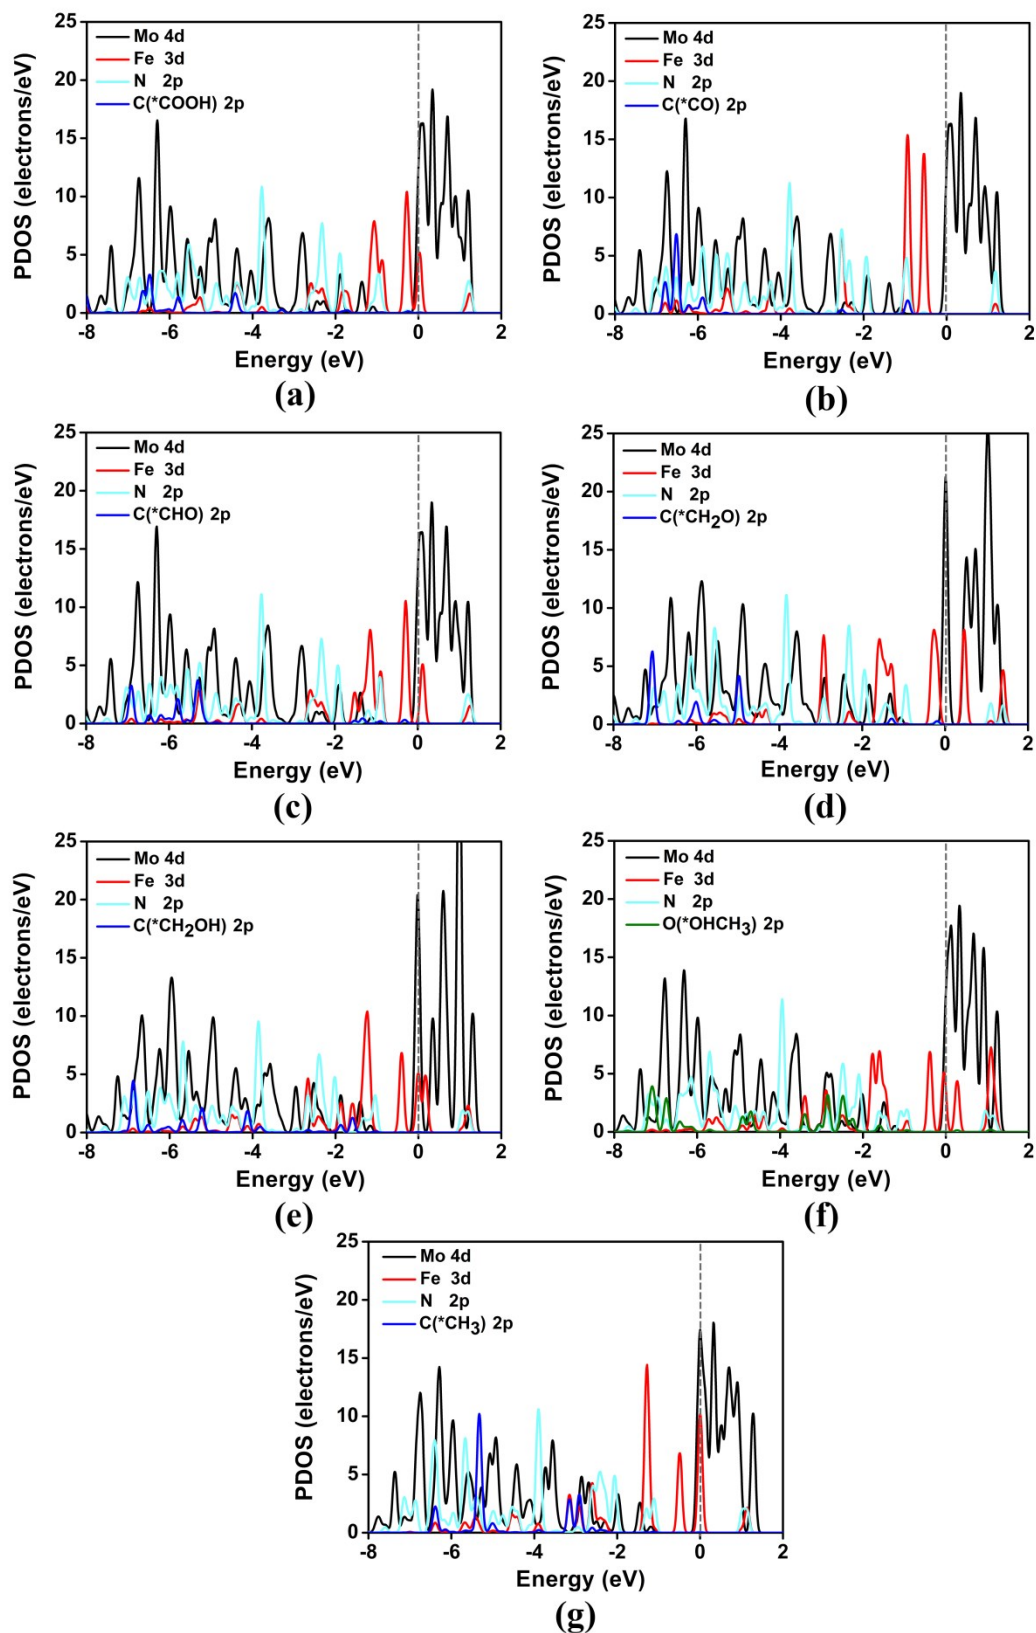

**Fig. S11** The PDOS of 2D reductive Fe-PMOF adsorbing the intermediates of each step along the optimal reaction pathway: (a)  $\text{*COOH}$ , (b)  $\text{*CO}$ , (c)  $\text{*CHO}$ , (d)  $\text{*CH}_2\text{O}$ , (e)  $\text{*CH}_2\text{OH}$ , (f)  $\text{*OHCH}_3$ , (g)  $\text{*CH}_3$ .

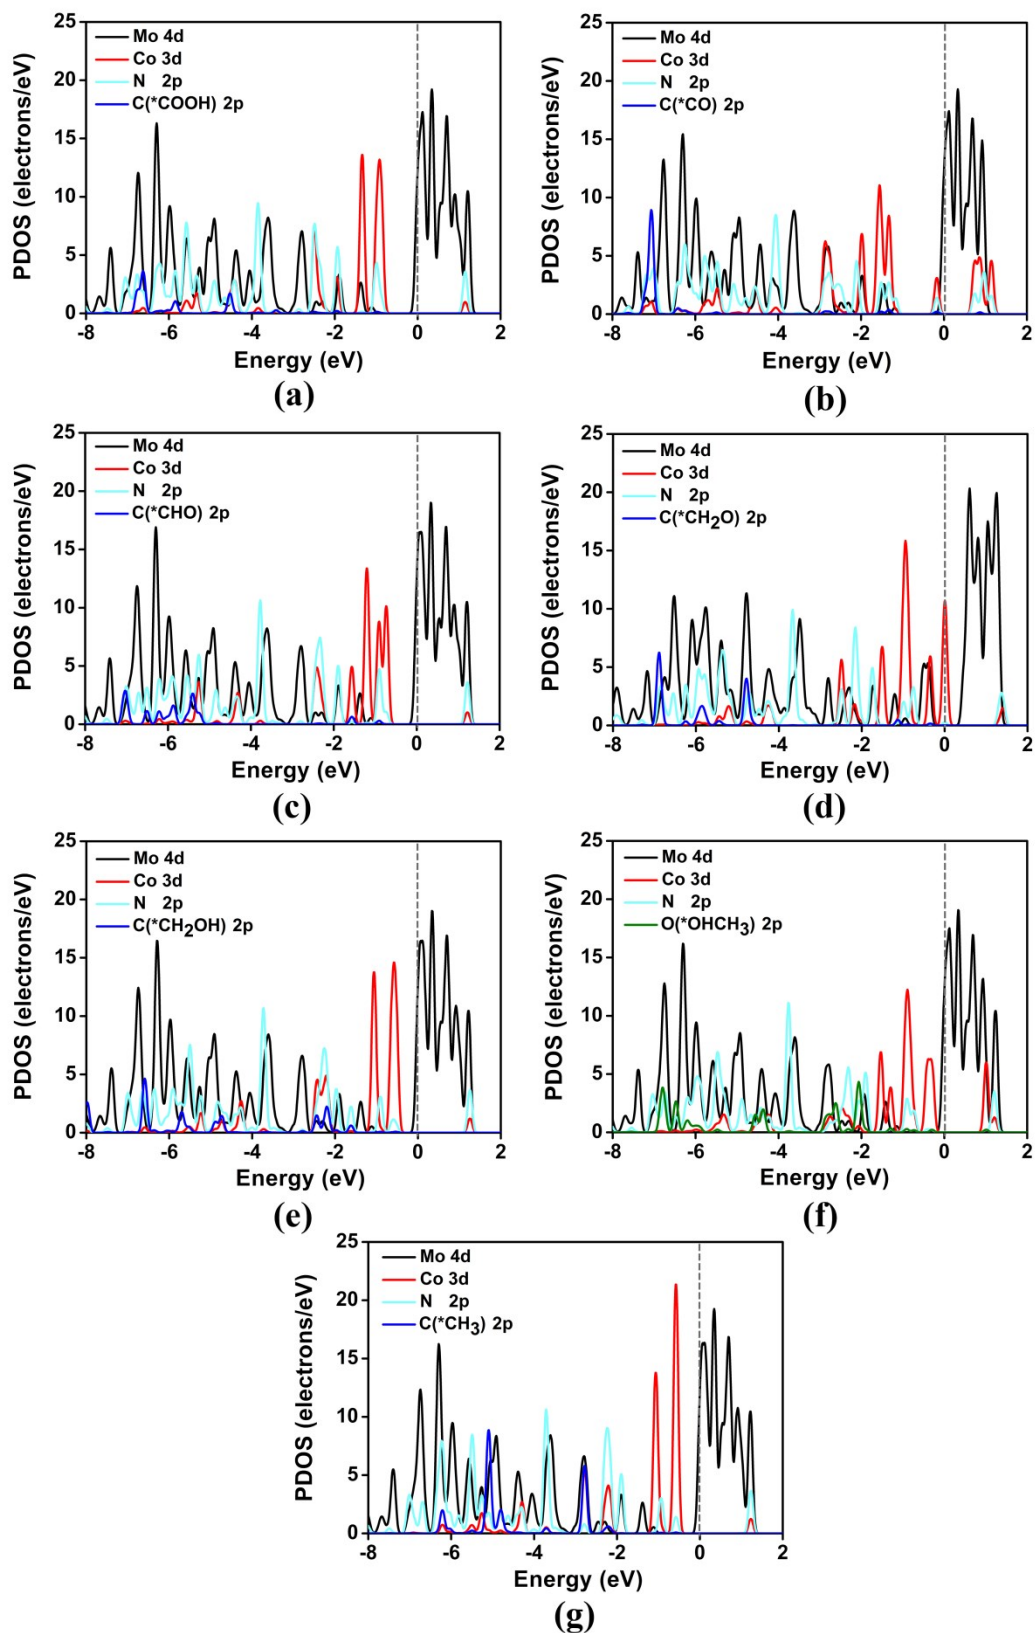

**Fig. S12** The PDOS of 2D reductive Co-PMOF adsorbing the intermediates of each step along the optimal reaction pathway: (a)  $^*\text{COOH}$ , (b)  $^*\text{CO}$ , (c)  $^*\text{CHO}$ , (d)  $^*\text{CH}_2\text{O}$ , (e)  $^*\text{CH}_2\text{OH}$ , (f)  $^*\text{OHCH}_3$ , (g)  $^*\text{CH}_3$ .

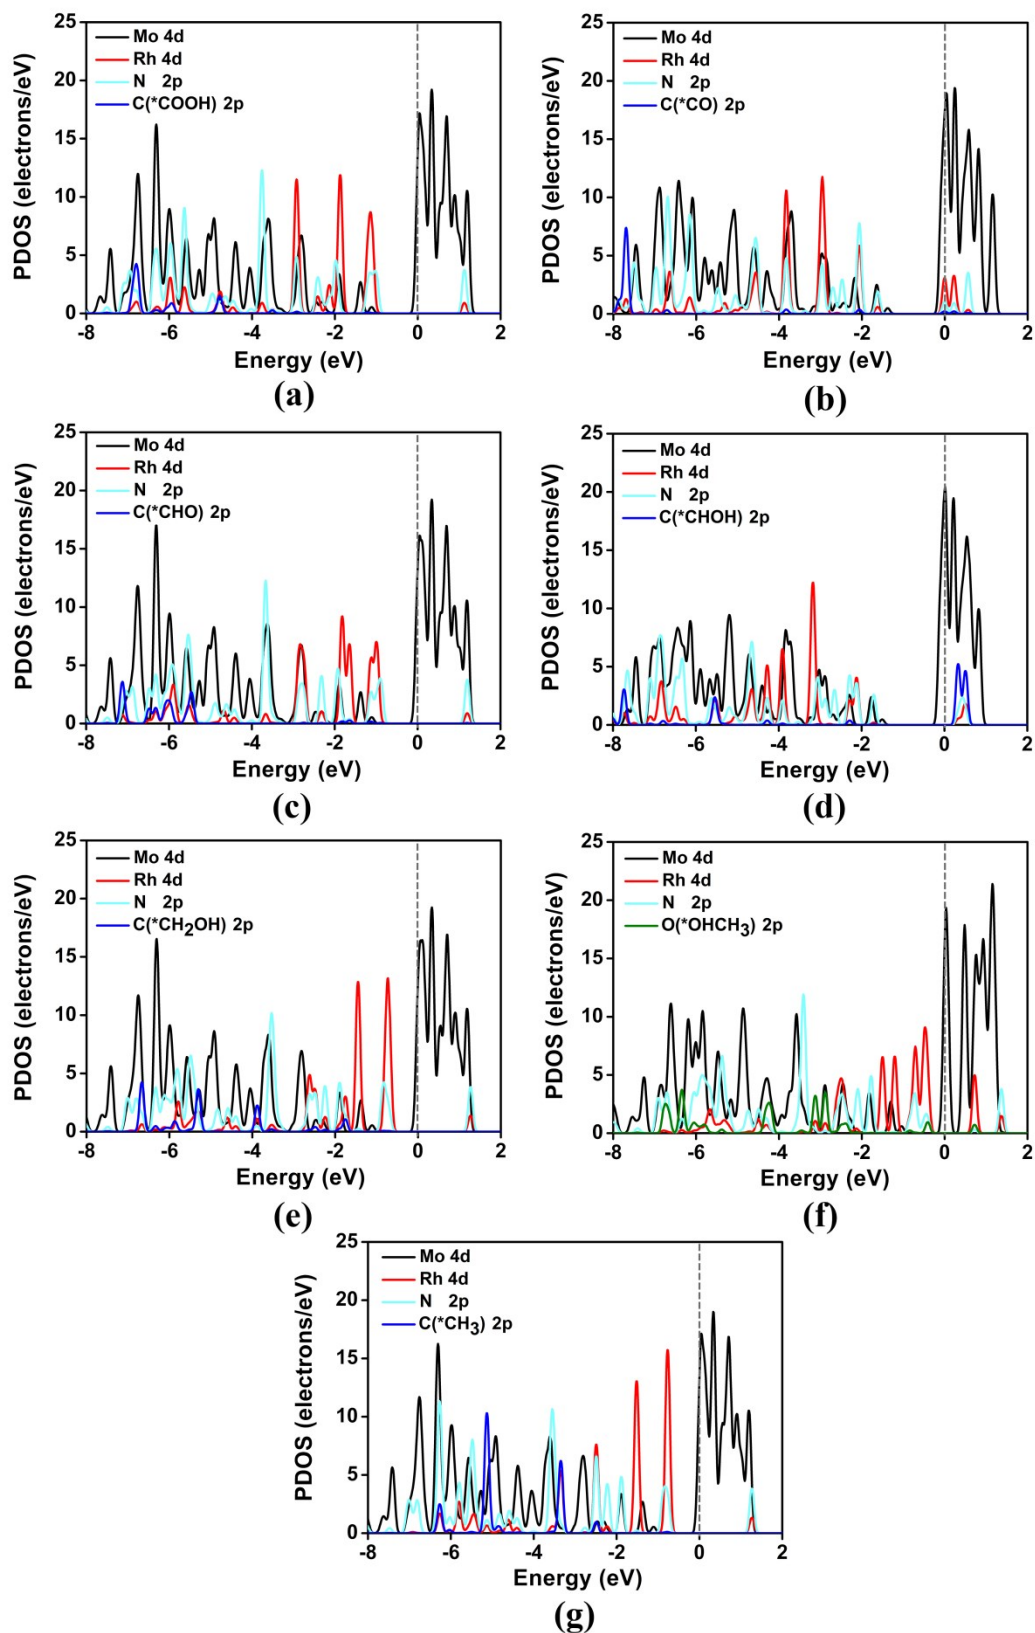

**Fig. S13** The PDOS of 2D reductive Rh-PMOF adsorbing the intermediates of each step along the optimal reaction pathway: (a)  $^*\text{COOH}$ , (b)  $^*\text{CO}$ , (c)  $^*\text{CHO}$ , (d)  $^*\text{CHOH}$ , (e)  $^*\text{CH}_2\text{OH}$ , (f)  $^*\text{OHCH}_3$ , (g)  $^*\text{CH}_3$ .



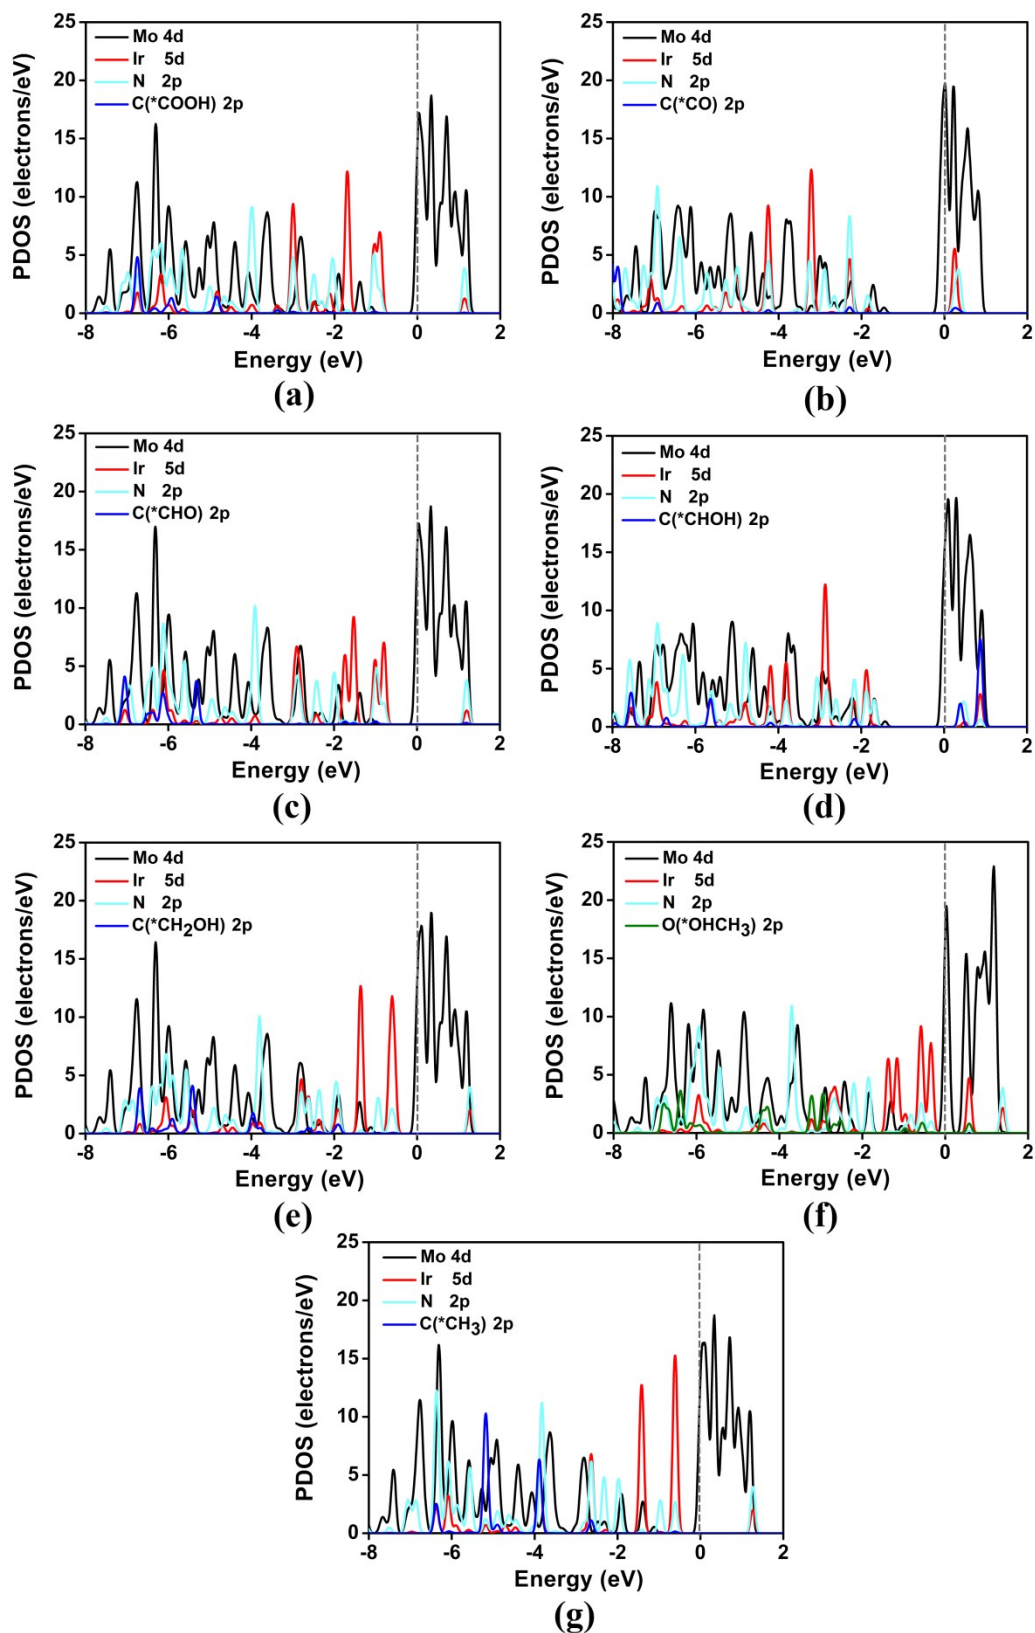

**Fig. S14** The PDOS of 2D reductive Ir-PMOF adsorbing the intermediates of each step along the optimal reaction pathway: (a)  $^*\text{COOH}$ , (b)  $^*\text{CO}$ , (c)  $^*\text{CHO}$ , (d)  $^*\text{CHOH}$ , (e)  $^*\text{CH}_2\text{OH}$ , (f)  $^*\text{OHCH}_3$ , (g)  $^*\text{CH}_3$ .

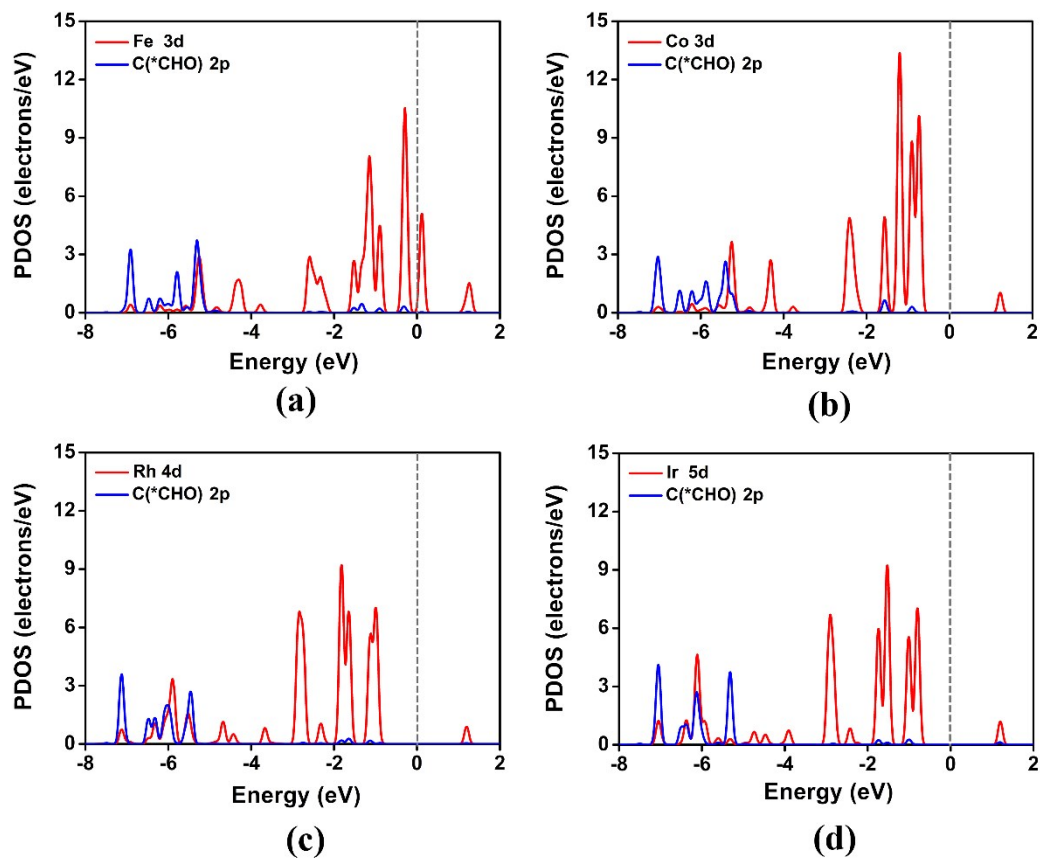

**Fig. S15** The PDOS of  $^*CHO$  intermediates adsorbed on 2D reductive (a) Fe-PMOF, (b) Co-PMOF, (c) Rh-PMOF, and (d) Ir-PMOF.

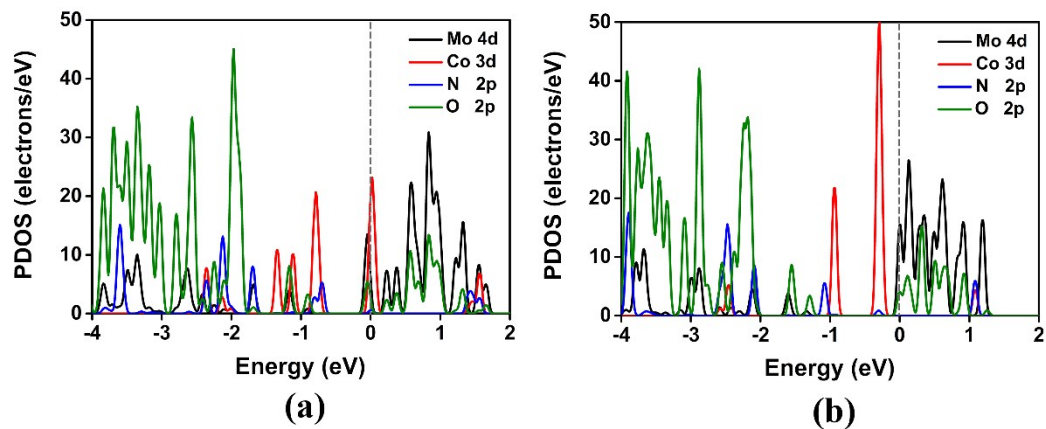

**Fig. S16** The PDOS of reductive Co-PMOF (a) before and (b) after another electron acquisition.

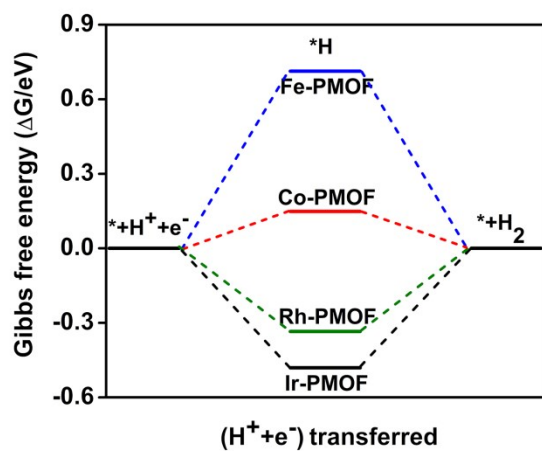

**Fig. S17** The Gibbs free energy diagram of HER on 2D reductive TM-PMOF (TM = Fe, Co, Rh, Ir).

**Table S2.** The calculated adsorption energy ( $E_{\text{ads}}$ , eV), cohesive energy per atom ( $E_{\text{coh}}$ , eV) and formation energy ( $E_{\text{f}}$ , eV) of 2D reductive TM-PMOF (TM = Fe, Co, Rh, Ir).

|         | $E_{\text{ads}}$ | $E_{\text{coh}}$ | $E_{\text{f}}$ |
|---------|------------------|------------------|----------------|
| Fe-PMOF | -9.67            | -5.62            | -0.29          |
| Co-PMOF | -9.40            | -5.61            | -0.29          |
| Rh-PMOF | -9.72            | -5.61            | -0.29          |
| Ir-PMOF | -5.70            | -5.58            | -0.24          |

For the TM-PMOF catalysts, the greater the adsorption energy ( $E_{\text{ads}}$ ) of the transition metal (TM) atoms to the substrate (PMOF), the better the stability of the catalyst. The  $E_{\text{ads}}$  of these TM atoms (TM = Fe, Co, Rh, Ir) on the 2D PMOF substrate can be calculated according to  $E_{\text{ads}} = E_{\text{TM-PMOF}} - E_{\text{TM}} - E_{\text{PMOF}}$ , the computed  $E_{\text{ads}}$  values of Fe-PMOF, Co-PMOF, Rh-PMOF, Ir-PMOF are - 9.67, - 9.40, - 9.72, - 5.70 eV, respectively, indicating strong interactions between these TM atoms and the PMOF substrate. The  $E_{\text{coh}}$  is calculated from the equation  $E_{\text{coh}} = (E_{\text{tot}} - aE_{\text{C}} - bE_{\text{N}} - cE_{\text{O}} - dE_{\text{H}} - eE_{\text{Mo}} - fE_{\text{TM}})/(a + b + c + d + e + f)$ , where  $E_{\text{tot}}$ ,  $E_{\text{C}}$ ,  $E_{\text{N}}$ ,  $E_{\text{O}}$ ,  $E_{\text{H}}$ ,  $E_{\text{Mo}}$ , and  $E_{\text{TM}}$  denote the energies of TM-PMOFs, isolated C, N, O, H, Mo, and TM atoms, respectively. The values of a-f are the numbers of C, N, O, H, Mo and TM atoms involved in the unit cell of TM-PMOFs, respectively. The  $E_{\text{f}}$  is also calculated according to  $E_{\text{f}} = (E_{\text{tot}} - a\mu_{\text{C}} - b\mu_{\text{N}} - c\mu_{\text{O}} - d\mu_{\text{H}} - e\mu_{\text{Mo}} - f\mu_{\text{TM}})/(a + b + c + d + e + f)$ , where  $\mu_{\text{C}}$ ,  $\mu_{\text{N}}$ ,  $\mu_{\text{O}}$ ,  $\mu_{\text{H}}$ ,  $\mu_{\text{Mo}}$ , and  $\mu_{\text{TM}}$  are the chemical potential of C, N, O, H, Mo, TM atoms, respectively. As shown in Table S2, the computed  $E_{\text{coh}}$  values of TM-PMOFs are lower than - 5 eV, confirming their high structural stability. Meanwhile, the calculated  $E_{\text{f}}$  values of TM-PMOFs are less than zero, which means that the studied TM-PMOFs are predicted to be relatively easy to synthesize experimentally.

**Table S3.** The optimal reaction pathways of 2D reductive TM-PMOF (TM = Fe, Co, Rh, Ir).

| Reaction step | Reaction pathways                                                                                                                                                   |
|---------------|---------------------------------------------------------------------------------------------------------------------------------------------------------------------|
| 1             | $* + \text{CO}_2 + \text{H}^+ + \text{e}^- \rightarrow *\text{COOH}$                                                                                                |
| 2             | $*\text{COOH} + \text{H}^+ + \text{e}^- \rightarrow *\text{CO} + \text{H}_2\text{O}$                                                                                |
| 3             | $*\text{CO} + \text{H}^+ + \text{e}^- \rightarrow *\text{CHO}$                                                                                                      |
| 4             | $*\text{CHO} + \text{H}^+ + \text{e}^- \rightarrow *\text{CH}_2\text{O}$ (or $*\text{CHO} + \text{H}^+ + \text{e}^- \rightarrow *\text{CHOH}$ )                     |
| 5             | $*\text{CH}_2\text{O} + \text{H}^+ + \text{e}^- \rightarrow *\text{CH}_2\text{OH}$ (or $*\text{CHOH} + \text{H}^+ + \text{e}^- \rightarrow *\text{CH}_2\text{OH}$ ) |
| 6             | $*\text{CH}_2\text{OH} + \text{H}^+ + \text{e}^- \rightarrow *\text{OHCH}_3$                                                                                        |
| 7             | $*\text{OHCH}_3 + \text{H}^+ + \text{e}^- \rightarrow *\text{CH}_3 + \text{H}_2\text{O}$                                                                            |
| 8             | $*\text{CH}_3 + \text{H}^+ + \text{e}^- \rightarrow * + \text{CH}_4$                                                                                                |

**Table S4.** Charge states analyzed by Hirshfeld charge of the three moieties for 2D reductive Co-PMOF along the optimal reaction pathway. The moieties 1, 2, and 3 represent the adsorbed  $\text{C}_x\text{O}_y\text{H}_z$ , the Co- $\text{N}_4$  unit, and the Co-PMOF substrate, respectively. 0, 1, 2, 3, 4, 5, 6, and 7 represent the  $\text{CO}_2$ ,  $*\text{COOH}$ ,  $*\text{CO}$ ,  $*\text{CHO}$ ,  $*\text{CH}_2\text{O}$ ,  $*\text{CH}_2\text{OH}$ ,  $*\text{OHCH}_3$ , and  $*\text{CH}_3$  intermediates along the reaction pathway.

| Reaction step | Moiety 1 | Moiety 2 | Moiety 3 |
|---------------|----------|----------|----------|
| 0             | -0.0030  | -0.2857  | 0.2887   |
| 1             | -0.1499  | -0.2516  | 0.4015   |
| 2             | 0.0376   | -0.2525  | 0.2149   |
| 3             | -0.0563  | -0.2515  | 0.3078   |
| 4             | -0.1351  | -0.2495  | 0.3846   |
| 5             | 0.0199   | -0.2200  | 0.2001   |
| 6             | 0.1821   | -0.2262  | 0.0441   |
| 7             | -0.0345  | -0.2025  | 0.2370   |

**The atomic coordinates of the optimized 2D reductive Co-PMOF system (provided in the format of Dmol<sup>3</sup> input),**

**PBC parameters: a = b = 18.79 Å, c=30 Å,  $\alpha = \beta = \gamma = 90^\circ$**

**atomic coordinates:**

|    |         |         |         |
|----|---------|---------|---------|
| Co | 9.3945  | 9.3945  | 15.0000 |
| Mo | 0.0000  | 0.0000  | 12.7776 |
| Mo | 0.0000  | 0.0000  | 17.2224 |
| Mo | 1.6889  | 17.1001 | 15.0000 |
| Mo | 17.1001 | 1.6889  | 15.0000 |
| Mo | 1.6953  | 1.6953  | 15.0000 |
| Mo | 17.0937 | 17.0937 | 15.0000 |
| N  | 2.9376  | 15.8514 | 15.0000 |
| N  | 15.8514 | 2.9376  | 15.0000 |
| N  | 2.9448  | 2.9448  | 15.0000 |
| N  | 15.8442 | 15.8442 | 15.0000 |
| N  | 9.3966  | 7.4203  | 15.0000 |
| N  | 9.3924  | 11.3687 | 15.0000 |
| N  | 7.4203  | 9.3966  | 15.0000 |
| N  | 11.3687 | 9.3924  | 15.0000 |
| O  | 1.3313  | 17.4577 | 13.0812 |
| O  | 17.4577 | 1.3313  | 13.0812 |
| O  | 17.4577 | 1.3313  | 16.9188 |
| O  | 1.3313  | 17.4577 | 16.9188 |
| O  | 0.0142  | 16.0727 | 15.0000 |
| O  | 18.7748 | 2.7163  | 15.0000 |
| O  | 16.0727 | 0.0142  | 15.0000 |
| O  | 2.7163  | 18.7748 | 15.0000 |
| O  | 0.0000  | 0.0000  | 10.6712 |
| O  | 0.0000  | 0.0000  | 19.3286 |
| O  | 0.0000  | 0.0000  | 15.0000 |
| O  | 1.3800  | 1.3800  | 16.9197 |
| O  | 17.4090 | 17.4090 | 16.9197 |
| O  | 1.3800  | 1.3800  | 13.0803 |
| O  | 17.4090 | 17.4090 | 13.0803 |
| C  | 14.8852 | 3.9038  | 15.0000 |
| C  | 3.9038  | 14.8852 | 15.0000 |
| C  | 14.3817 | 4.4073  | 16.2222 |
| C  | 4.4073  | 14.3817 | 16.2222 |
| C  | 4.4073  | 14.3817 | 13.7777 |
| C  | 14.3817 | 4.4073  | 13.7777 |
| C  | 8.2978  | 6.5690  | 15.0000 |
| C  | 10.4912 | 12.2200 | 15.0000 |

|   |         |         |         |
|---|---------|---------|---------|
| C | 6.5690  | 8.2978  | 15.0000 |
| C | 12.2200 | 10.4912 | 15.0000 |
| C | 8.7128  | 5.1914  | 15.0000 |
| C | 10.0762 | 13.5976 | 15.0000 |
| C | 5.1914  | 8.7128  | 15.0000 |
| C | 13.5976 | 10.0762 | 15.0000 |
| C | 10.0771 | 5.1903  | 15.0000 |
| C | 8.7119  | 13.5987 | 15.0000 |
| C | 5.1903  | 10.0771 | 15.0000 |
| C | 13.5987 | 8.7119  | 15.0000 |
| C | 10.4946 | 6.5669  | 15.0000 |
| C | 8.2944  | 12.2221 | 15.0000 |
| C | 6.5669  | 10.4946 | 15.0000 |
| C | 12.2221 | 8.2944  | 15.0000 |
| C | 11.8328 | 6.9562  | 15.0000 |
| C | 6.9562  | 11.8328 | 15.0000 |
| C | 12.8906 | 5.8984  | 15.0000 |
| C | 5.8984  | 12.8906 | 15.0000 |
| C | 13.3956 | 5.3934  | 13.7889 |
| C | 5.3934  | 13.3956 | 13.7889 |
| C | 5.3934  | 13.3956 | 16.2110 |
| C | 13.3956 | 5.3934  | 16.2110 |
| C | 3.9101  | 3.9101  | 15.0000 |
| C | 14.8789 | 14.8789 | 15.0000 |
| C | 4.4139  | 4.4139  | 16.2222 |
| C | 14.3751 | 14.3751 | 16.2222 |
| C | 4.4139  | 4.4139  | 13.7777 |
| C | 14.3751 | 14.3751 | 13.7777 |
| C | 11.8286 | 11.8286 | 15.0000 |
| C | 6.9604  | 6.9604  | 15.0000 |
| C | 5.9039  | 5.9039  | 15.0000 |
| C | 12.8851 | 12.8851 | 15.0000 |
| C | 5.3996  | 5.3996  | 16.2120 |
| C | 13.3894 | 13.3894 | 16.2120 |
| C | 5.3996  | 5.3996  | 13.7880 |
| C | 13.3894 | 13.3894 | 13.7880 |
| H | 0.5636  | 0.5636  | 10.1066 |
| H | 18.2254 | 18.2254 | 10.1066 |
| H | 0.5636  | 0.5636  | 19.8933 |
| H | 18.2254 | 18.2254 | 19.8933 |
| H | 13.0108 | 5.7782  | 17.1573 |
| H | 5.7782  | 13.0108 | 17.1573 |
| H | 5.7782  | 13.0108 | 12.8427 |
| H | 13.0108 | 5.7782  | 12.8427 |

|   |         |         |         |
|---|---------|---------|---------|
| H | 14.7714 | 4.0176  | 17.1630 |
| H | 4.0176  | 14.7714 | 17.1630 |
| H | 4.0176  | 14.7714 | 12.8369 |
| H | 14.7714 | 4.0176  | 12.8369 |
| H | 8.0325  | 4.3444  | 15.0000 |
| H | 10.7565 | 14.4446 | 15.0000 |
| H | 4.3444  | 8.0325  | 15.0000 |
| H | 14.4446 | 10.7565 | 15.0000 |
| H | 10.7560 | 4.3421  | 15.0000 |
| H | 8.0330  | 14.4469 | 15.0000 |
| H | 4.3421  | 10.7560 | 15.0000 |
| H | 14.4469 | 8.0330  | 15.0000 |
| H | 5.7855  | 5.7855  | 17.1573 |
| H | 13.0035 | 13.0035 | 17.1573 |
| H | 5.7855  | 5.7855  | 12.8427 |
| H | 13.0035 | 13.0035 | 12.8427 |
| H | 4.0234  | 4.0234  | 17.1624 |
| H | 14.7656 | 14.7656 | 17.1624 |
| H | 4.0234  | 4.0234  | 12.8376 |
| H | 14.7656 | 14.7656 | 12.8376 |



## Supplementary References

- 1 B. Delley, *J. Chem. Phys.*, 1990, **92**, 508-517.
- 2 B. Delley, *J. Chem. Phys.*, 2000, **113**, 7756-7764.
- 3 J. P. Perdew, K. Burke and M. Ernzerhof, *Phys. Rev. Lett.*, 1996, **77**, 3865-3868.
- 4 B. Delley, *Phys. Rev. B: Condens. Matter Mater. Phys.*, 2002, **66**, 155125-155133.
- 5 S. Grimme, *J. Comput. Chem.*, 2006, **27**, 1787-1799.
- 6 F. L. Hirshfeld, *Theor. Chim. Acta*, 1977, **44**, 129-138.
- 7 J. K. Nørskov, J. Rossmeisl, A. Logadottir, L. Lindqvist, J. R. Kitchin, T. Bligaard and H. Jónsson, *J. Phys. Chem. B*, 2004, **46**, 17886-17892.
- 8 J. Rossmeisl, A. Logadottir and J. K. Nørskov, *Chem. Phys.*, 2005, **319**, 178-184.
- 9 J. Zhao, J. X. Zhao, F. Y. Li and Z. F. Chen, *J. Phys. Chem. C*, 2018, **122**, 19712-19721.
- 10 J. H. Liu, L. M. Yang and E. Ganz, *J. Mater. Chem. A*, 2019, **7**, 3805-3814.
- 11 J. H. Liu, L. M. Yang and E. Ganz, *ACS Sustainable Chem. Eng.*, 2018, **6**, 15494-15502.
- 12 Computational Chemistry Comparison and Benchmark Database.  
<http://cccbdb.nist.gov/>.
- 13 Y. R. Wang, Q. Huang, C. T. He, Y. F. Chen, J. Liu, F. C. Shen and Y. Q. Lan, *Nat. Commun.*, 2018, **9**, 4466.
- 14 Q. Huang, J. Liu, L. Feng, Q. Wang, W. Guan, L. Z. Dong, L. Zhang, L. K. Yan, Y. Q. Lan and H. C. Zhou, *Nati. Sci. Rev.*, 2020, **7**, 53-63.
- 15 F. Y. Yu, Z. L. Lang, L. Y. Yin, K. Feng, Y. J. Xia, H. Q. Tan, H. T. Zhu, J. Zhong, Z. H. Kang and Y. G. Li, *Nat. Commun.*, 2020, **11**, 490.
- 16 J. Du, Z. L. Lang, Y. Y. Ma, H. Q. Tan, B. L. Liu, Y. H. Wang, Z. H. Kang and Y. G. Li, *Chem. Sci.*, 2020, **11**, 3007-3015.
